# Supplementary material for: Widespread presence of chlorinated paraffins in consumer products
Source: Royal Society of Chemistry journal article supplement (doi:10.1039/d2em00494a), 2023-01-01
Supplement: d2em00494a1.xlsx [file d2em00494a1.xlsx]

## Sheet: Supplemenary Data
Supplementary Data. Concentrations (µg/g) of SCCPs, MCCPs, and LCCPs across 96 Canadian indoor products.
Sample ID	Identity	Material	Category	Sub-Category	SCCPs	MCCPs	LCCPs
1	Blue/Yellow Bed Sheet	Organic Fibres	Household	-	0.63901	5.74175	7.61094
2	White Indoor Paint	Paint	Indoor Paint	-	9.92786	10.0993	0.543911
3	Face Wash	Gel	Personal Care Products	Skin Creams	<MDL	<MDL	0.0118858
4	Shampoo	Gel	Personal Care Products	Hair Products	<MDL	<MDL	0.0232352
5	Hand Soap	Surfactant	Personal Care Products	Cleaners	0.00314887	0.0158048	0.0389195
6	White T-Shirt	Organic Fibres	Clothing	-	2.57397	9.94078	0.516589
7	Headphone Wire Covering	Flexible Plastic	E-Waste	-	3005.75	5053	628.286
8	Hard Plastic Headphones	Hard Plastic	E-Waste	-	<MDL	0.0105902	0.0606281
9	Jeans	Organic Fibres	Clothing	-	8.16601	17.9823	0.90609
10	White Carpet	Synthetic Fibres	Carpet	-	0.214137	1.82353	0.0494871
11	Hydrating lotion	Gel	Personal Care Products	Skin Creams	0.0225891	0.10792	0.0445045
12	Facial cleanser	Gel	Personal Care Products	Skin Creams	<MDL	0.225652	0.0628455
13	Toothpaste	Gel	Personal Care Products	Toothpaste	<MDL	0.0912745	0.078644
14	Shampoo	Gel	Personal Care Products	Hair Products	<MDL	0.749485	0.475408
15	Body wash	Gel	Personal Care Products	Body Wash	<MDL	0.00370766	<MDL
16	Hair conditioner	Gel	Personal Care Products	Hair Products	<MDL	0.210471	0.00959976
17	Hand cream	Gel	Personal Care Products	Skin Creams	0.00780587	0.216059	0.0151008
18	White Vinyl Shower Curtain	Vinyl	Household	-	69.0848	70.6159	7.3682
19	Yellow Cotton Shirt	Organic Fibres	Clothing	-	1.45537	1.92102	0.579757
20	Blue Cotton Shirt	Organic Fibres	Clothing	-	10.7652	11.3773	0.194631
21	Computer Wire Covering	Flexible Plastic	E-Waste	-	9338.13	18660.8	5791.65
22	Skin cream	Gel	Personal Care Products	Skin Creams	<MDL	1.7439	0.100512
23	Shampoo	Gel	Personal Care Products	Hair Products	0.00492043	0.056795	0.00759824
24	Toothpaste	Gel	Personal Care Products	Toothpaste	<MDL	<MDL	0.0205131
25	Body wash	Gel	Personal Care Products	Body Wash	<MDL	0.0201503	0.346724
26	Face cleanser	Gel	Personal Care Products	Skin Creams	<MDL	0.00526036	0.0832499
27	Blue toy racecar	Hard Plastic	Children's Toys	-	<MDL	0.29415	0.0406149
28	Dark Blue/Black Cotton Shirt	Organic Fibres	Clothing	-	1.16495	1.61973	0.104501
29	Pink/White Shirt	Organic Fibres	Clothing	-	1.95062	1.93115	0.109009
30	Gray Sweater	Organic Fibres	Clothing	-	3.00417	5.42557	0.324471
31	Blue/White Jeans	Organic Fibres	Clothing	-	2.01772	3.17623	0.494532
32	Blue/White Jeans	Organic Fibres	Clothing	-	1.6977	4.32462	0.227749
33	Gray Carpet	Synthetic Fibres	Carpet	-	3.53118	6.42824	0.173281
34	Black Stuffed Animal Fur	Synthetic Fibres	Children's Toys	-	0.101668	0.501488	0.169877
35	Pink Stuffed Animal Fur	Synthetic Fibres	Children's Toys	-	0.681487	1.81327	0.292022
36	Blue/White Pillow Case	Organic Fibres	Household	-	13.8625	17.8597	2.11292
37	"Finding Dory" Vinyl Stickers (Blue/Yellow/White/Black)	Vinyl	Stickers	-	0.418908	0.515161	0.150077
38	Green Rubber Toddler's Chew Toy	Rubber	Children's Toys	-	5.3656	6.34201	0.311906
39	Plastic Rattle Handle	Flexible Plastic	Children's Toys	-	2.77759	2.91253	0.112984
40	Green building toy	Hard Plastic	Children's Toys	-	0.295032	0.282932	0.0690809
41	Hand soap	Surfactant	Personal Care Products	Cleaners	<MDL	0.0299103	0.0202835
42	Bathroom cleaner	Surfactant	Personal Care Products	Cleaners	0.0103838	0.0618876	0.0446779
43	Hair gel	Gel	Personal Care Products	Hair Products	0.0429959	0.332446	1.99792
44	Shampoo	Gel	Personal Care Products	Hair Products	0.0125642	0.0221967	0.0117922
45	Dish soap	Surfactant	Personal Care Products	Cleaners	<MDL	0.00121886	5.52301
46	Unknown Vinyl Product	Vinyl	Household	-	5.84505	4.34586	1.12123
47	Carpet	Synthetic Fibres	Carpet	-	0.00686079	0.0600584	0.00616708
48	White Indoor Paint	Paint	Indoor Paint	-	14.322	5.07469	0.0370215
49	Unknown children's toy	Hard Plastic	Children's Toys	-	0.0406554	0.0122846	0.0460322
50	Skin cream	Gel	Personal Care Products	Skin Creams	0.00994496	<MDL	0.036827
51	Shampoo	Gel	Personal Care Products	Hair Products	0.0818037	0.0565404	0.070985
52	White Indoor Bathroom Paint	Paint	Indoor Paint	-	5.06843	5.87541	0.0591964
53	Red T-Shirt	Organic Fibres	Clothing	-	0.187642	0.34754	0.94039
54	Yellow T-Shirt	Organic Fibres	Clothing	-	0.30413	0.42634	0.846122
55	Shampoo	Gel	Personal Care Products	Hair Products	0.0178974	0.0109606	0.0640081
56	Conditioner	Gel	Personal Care Products	Hair Products	0.185642	0.0935606	0.186318
57	Hand cream	Gel	Personal Care Products	Skin Creams	0.113713	0.0872077	0.229189
58	Turquoise/White Foam Dolphin	Foam	Children's Toys	-	1.59041	19.0237	0.021859
59	Rubber from Leather Boot Tread	Rubber	Shoes	-	93.9615	175.966	11.6352
60	Synthetic Leather Boot Tongue	Synthetic Fibres	Shoes	-	548.475	214.455	81.1823
61	Canvas Reusable Bag	Synthetic Fibres	Other	-	4802.26	2635.36	1178.61
62	Black Synthetic Fibres from Reusable Shopping Bag	Synthetic Fibres	Other	-	105.688	8.91721	0.148608
63	Dark Gray Men's Sock	Organic Fibres	Clothing	-	2.26616	0.901091	3.84673
64	Black Backpack Strap	Synthetic Fibres	Other	-	0.580638	1.02512	0.145456
65	Dark Gray Cat Tree Carpeting	Synthetic Fibres	Carpet	-	0.753903	1.51239	0.103005
66	White Indoor Bathroom Paint	Paint	Indoor Paint	-	14.0702	5.40067	0.151618
67	White Curtain Slats	Vinyl	Household	-	0.37194	0.22585	0.0492855
68	Pink Stickers	Vinyl	Stickers	-	0.837055	0.85206	0.514988
69	Green printed cardboard box	Paper Products	Cardboard	-	2.89277	4.35041	0.154805
70	Brown plain cardboard	Paper Products	Cardboard	-	1.44571	3.12738	0.313961
71	White cardstock greeting card	Paper Products	Cardboard	-	0.111811	0.0693675	0.104918
72	Orange paper envelope	Paper Products	Paper	-	0.177796	0.189408	0.0921423
73	Black/green/purple printed cardboard toy packaging	Paper Products	Toy Packaging	-	1.96028	3.03934	0.140208
74	Green printed cardboard toy packaging	Paper Products	Toy Packaging	-	121.841	58.345	1.67431
75	Blue/yellow printed cardboard toy packaging	Paper Products	Toy Packaging	-	8.27304	4.54146	0.129277
76	Purple printed cardboard toy packaging	Paper Products	Toy Packaging	-	3.59872	5.42496	0.121098
77	Gray/red/yellow printed cardboard toy packaging	Paper Products	Toy Packaging	-	0.460901	1.43588	0.0721459
78	Blue printed cardboard toy packaging	Paper Products	Toy Packaging	-	2.19733	2.64796	0.0782876
79	Black scissors handle	Hard Plastic	Other	-	13.6383	17.2961	0.678249
80	Green cookie cutters	Hard Plastic	Children's Toys	-	0.153904	0.185005	0.0856919
81	Black miniature hockey stick	Hard Plastic	Children's Toys	-	0.164157	0.911637	0.0966649
82	Pink miniature toy saxophone	Hard Plastic	Children's Toys	-	0.0615664	0.0468813	0.184871
83	Green toy grabber	Hard Plastic	Children's Toys	-	0.184958	0.220972	0.167562
84	White/orange/black toy giraffe	Hard Plastic	Children's Toys	-	1.70125	1.03092	1.46618
85	Hard Foam Toy Alligator (Water-Absorbant)	Foam	Children's Toys	-	0.270163	0.167414	0.222293
86	Purple toy comb	Hard Plastic	Children's Toys	-	0.105008	0.281382	0.15585
87	Black toy racecar	Hard Plastic	Children's Toys	-	0.0928338	0.0750758	0.115212
88	Black Rubber from Running Shoe Tread	Rubber	Shoes	-	38.0477	291.415	8.10667
89	Light Gray Rubber from Running Shoe Heel Cushioning	Rubber	Shoes	-	5.80311	25.5443	0.286971
90	Metallic Silver-Coloured Twist Ties	Flexible Plastic	Twist-Ties	-	0.356802	0.495155	0.156503
91	Red foam ball	Foam	Children's Toys	-	2021.05	3410.89	142.838
92	Brown Soft Foam Poop Toy	Foam	Children's Toys	-	2.59981	4.84466	0.095556
93	Orange Hollow Plastic Pony	Flexible Plastic	Children's Toys	-	5.49108	5.46071	3.24801
94	Metallic Blue-Coloured Stretchy Worm	Flexible Plastic	Children's Toys	-	13.4339	5.21191	0.210608
95	Yellow Hollow Ball 1	Flexible Plastic	Children's Toys	-	1.74408	2.75416	1.39451
96	Yellow Hollow Ball 2	Flexible Plastic	Children's Toys	-	2.08713	3.65857	0.271424
