# Supplementary material for: Widespread presence of chlorinated paraffins in consumer products
Source: Royal Society of Chemistry journal article supplement (doi:10.1039/d2em00494a), 2023-01-01
Supplement: d2em00494a2.pdf [file d2em00494a2.pdf]

1 **Supporting Information**

2 For

3 **Widespread Presence of Chlorinated Paraffins in Consumer Products**

4  
5  
6  
7 Steven Kutarna<sup>a</sup>, Xuan Du<sup>a</sup>, Miriam L. Diamond<sup>b,c</sup>, Arlene Blum<sup>d,e</sup>, Hui Peng<sup>\*a,c</sup>

8  
9 <sup>a</sup> Department of Chemistry, University of Toronto, Toronto, ON, Canada

10 <sup>b</sup> Department of Earth Sciences, University of Toronto, ON, Canada

11 <sup>c</sup> School of the Environment, University of Toronto, Toronto, ON, Canada

12 <sup>d</sup> Green Science Policy Institute, Berkeley, California 94709, United States

13 <sup>e</sup> Department of Cell and Molecular Biology, University of California, Berkeley, CA, United  
14 States

15  
16  
17 **\*Corresponding author: Hui Peng**, e-mail: hui.peng@utoronto.ca, Department of Chemistry,

18 University of Toronto, Toronto, Ontario, M5S3H6, Canada.

19  
20 Words 1342

21 Tables 4

22 Figures 2

23 This supporting information provides text and figures addressing (1) Method for semi-  
24 quantification of chlorinated paraffins; (2) Sampled products information; (3) Detection limits; (4)  
25 Recoveries; (5) Chlorine contents of CP technical mixtures; (6) Photos of consumer products with  
26 high concentrations of CPs; (7) Atomic distributions of CP Homologues in representative products.

27

28

29

### 30 **Semi-Quantitation of Chlorinated Paraffins**

31 Six technical mixtures of CPs were used for this method: 2 SCCP mixtures (C<sub>10</sub>-C<sub>13</sub>, 51.5%  
32 Cl; C<sub>10</sub>-C<sub>13</sub>, 63% Cl), 2 MCCP mixtures (C<sub>14</sub>-C<sub>17</sub>, 42% Cl; C<sub>14</sub>-C<sub>17</sub>, 57% Cl), and 2 LCCP mixtures  
33 (C<sub>18</sub>-C<sub>20</sub>, 36% Cl; C<sub>18</sub>-C<sub>20</sub>, 49% Cl). Quantification of CPs was based on the method of Reth et.  
34 al.<sup>1</sup> and is summarized by Eqs. 2-8 below.

35 For each technical mixture, peak areas of the most abundant isotope of each common  
36 [M+Cl]- Homologue were collected and normalized by the peak area of the mass-labelled internal  
37 standard <sup>13</sup>C<sub>10</sub>-anti-DP, which was added to every standard solution and spiked into every sample  
38 at the same concentration.

$$39 \text{ Normalized Isotope Area} = \frac{\text{Isotope Peak Area}}{\text{Internal Standard Peak Area}} \quad (2)$$

40 The full area of each detected Homologue was then estimated by dividing the normalized  
41 area by the natural percent abundance of the isotope peak detected.

$$42 \text{ Normalized Congener Peak Area} = \frac{\text{Normalized Isotope Area}}{\% \text{ Abundance of Detected Isotope}} \quad (3)$$

43 The response factor (RF) for each technical mixture was calculated by dividing the sum of  
44 all Homologue peak areas in the mixture by the concentration used.

$$45 \text{ RF (Mixture)} = \frac{\sum \text{Normalized Congener Peak Areas}}{\text{Technical Mixture Concentration}} \quad (4)$$

46 Chlorine content for the technical mixture was calculated from the exact mass % of  
47 chlorine for each Homologue using Eq. 5. As CP Homologues with fewer chlorines (<5) are more  
48 difficult to detect, this method often overestimates the chlorine contents of technical mixtures with

49 lower degrees of chlorination. Table S4 summarizes the difference between calculated and  
50 manufacturer-provided chlorine contents for each technical mixture used.

$$51 \quad \%Cl (Mixture) = \sum \left( \frac{\text{Normalized Congener Peak Area}}{\sum \text{Normalized Congener Peak Areas}} * \%Cl (Congener) \right) \quad (5)$$

52 The exact mass % of chlorine for each Homologue was obtained using Eq. 6:

$$53 \quad \%Cl (Congener) = \frac{\text{Total Molar Mass of Cl in Congener}}{\text{Molecular Mass of Congener}} \quad (6)$$

54 The RF was then plotted against the %Cl for each pair of mixtures containing the same CP  
55 chain lengths, and linear regression was performed to obtain three different versions of Eq. 7, one  
56 each for SCCPs, MCCPs, and LCCPs:

$$57 \quad RF (Mixture) = a * \%Cl (Mixture) + b \quad (7)$$

58 Quantification of SCCPs, MCCPs, or LCCPs in each sample was then performed by first  
59 applying Eqs. 2, 3, and 5 to obtain the overall %Cl of CPs in the sample, then using the appropriate  
60 version of Eq. 7 to calculate the Sample RF. Finally, the concentration of SCCPs, MCCPs, or  
61 LCCPs in the sample was calculated from the Sample RF using Eq. 8.

$$62 \quad \text{Concentration of CPs (Sample)} = \frac{\sum \text{Normalized Congener Peak Areas (Sample)}}{RF (Sample)} \quad (8)$$

63

64 **Table S1.** Information of 96 Canadian Consumer Products.

| <b>Category</b>          | <b>Product ID#</b>        | <b>Description</b>                             | <b>New/Used</b>    |
|--------------------------|---------------------------|------------------------------------------------|--------------------|
| <b>Clothing and Bags</b> | 6                         | White Cotton T-Shirt                           | Used               |
|                          | 9                         | Blue Denim Jeans (women's)                     | Used               |
|                          | 19                        | Yellow Cotton T-Shirt                          | Used               |
|                          | 20                        | Blue Cotton Shirt                              | Used               |
|                          | 28                        | Navy Blue Cotton Shirt                         | Used               |
|                          | 29                        | Pink and White Shirt                           | Used               |
|                          | 30                        | Gray Sweater                                   | Used               |
|                          | 31                        | Blue Denim Jeans                               | Used               |
|                          | 32                        | Blue Denim Jeans                               | Used               |
|                          | 53                        | Red Cotton T-Shirt                             | Used               |
|                          | 54                        | Yellow Cotton T-Shirt                          | Used               |
|                          | 63                        | Dark Gray Socks                                | Used               |
|                          | 60                        | Synthetic Leather High-Heeled Boot (Tongue)    | Used               |
|                          | 59                        | Synthetic Leather High-Heeled Boot (Tread)     | Used               |
|                          | 88                        | White Running Shoe (Tread)                     | Used               |
|                          | 89                        | White Running Shoe (Interior Heel Cushioning)  | Used               |
|                          | 61                        | Beige Canvas Reusable Shopping Bag             | Used               |
|                          | 62                        | Black Rope Handle (from Reusable Shopping Bag) | Used               |
|                          | 64                        | Black Backpack Strap                           | Used               |
|                          | <b>Indoor Furnishings</b> | 10                                             | White Plush Carpet |
| 33                       |                           | Gray Carpet                                    | Used               |
| 47                       |                           | Black Carpet                                   | Used               |
| 65                       |                           | Dark Gray Cat Tree Carpeting                   | Used               |
| 2                        |                           | White Indoor Paint (Living Room)               | Used               |
| 48                       |                           | White Indoor Paint (Living Room)               | Used               |
| 52                       |                           | White Indoor Paint (Bathroom)                  | Used               |
| 66                       |                           | White Indoor Paint (Bathroom)                  | Used               |
| 18                       |                           | White Shower Curtain                           | Used               |
| 67                       |                           | White Curtain Slats                            | Used               |
| 46                       |                           | Vinyl Heating Bag                              | Used               |
| 1                        |                           | Yellow Patterned Bed Sheet                     | Used               |
| 36                       |                           | Pale Blue Pillow Case                          | Used               |
| <b>Toys</b>              | 34                        | Black Stuffed Animal (Fur)                     | Used               |

|                                |    |                                            |      |
|--------------------------------|----|--------------------------------------------|------|
|                                | 35 | Pink Stuffed Animal (Fur)                  | Used |
|                                | 39 | Yellow Plastic Rattle Handle               | Used |
|                                | 93 | Orange Plastic Miniature Pony              | New  |
|                                | 94 | Blue Stretchy Worm Toy                     | New  |
|                                | 95 | Yellow Bouncy Ball                         | New  |
|                                | 96 | Orange-Yellow Bouncy Ball                  | New  |
|                                | 38 | Green Rubber Toddler's Chew<br>Toy (Glove) | Used |
|                                | 58 | Turquoise Foam Dolphin                     | Used |
|                                | 91 | Red Foam Ball                              | New  |
|                                | 92 | Brown Foam Fake Poop                       | New  |
|                                | 85 | Hard Foam Water-Absorbent<br>Toy Alligator | New  |
|                                | 37 | Vinyl Stickers (Finding Dory)              | New  |
|                                | 68 | Vinyl Stickers (Princesses)                | Used |
|                                | 27 | Blue Toy Racecar                           | Used |
|                                | 40 | Green Building Toy                         | Used |
|                                | 49 | White Building Toy                         | Used |
|                                | 80 | Green Children's Cookie<br>Cutters         | New  |
|                                | 81 | Black Miniature Hockey Stick               | New  |
|                                | 82 | Pink Miniature Toy Saxophone               | New  |
|                                | 83 | Green "Grabber" Toy                        | New  |
|                                | 84 | Orange Toy Giraffe                         | New  |
|                                | 86 | Purple Toy Comb                            | New  |
|                                | 87 | Black Toy Racecar                          | New  |
| <b>Electronics</b>             | 7  | Headphone Wires (Plastic<br>Sheath)        | Used |
|                                | 21 | Computer Wires (Plastic<br>Sheath)         | Used |
|                                | 8  | Over-Ear Headphones                        | Used |
| <b>Paper and<br/>Packaging</b> | 72 | Orange Paper Envelope                      | New  |
|                                | 69 | Green-Printed Cardboard Box                | New  |
|                                | 70 | Unmarked Cardboard Box                     | Used |
|                                | 71 | White Cardstock Greeting Card              | Used |
|                                | 73 | Black/Purple Cardboard Toy<br>Packaging    | New  |
|                                | 74 | Green Cardboard Toy<br>Packaging           | New  |
|                                | 75 | Blue/Yellow Cardboard Toy<br>Packaging     | New  |
|                                | 76 | Purple Cardboard Toy<br>Packaging          | New  |
|                                | 77 | Red/Yellow Cardboard Toy<br>Packaging      | New  |

|                               |    |                              |      |
|-------------------------------|----|------------------------------|------|
|                               | 78 | Blue Cardboard Toy Packaging | New  |
| <b>Personal Care Products</b> | 3  | Face Wash                    | Used |
|                               | 11 | Hydrating Lotion             | Used |
|                               | 12 | Facial Cleanser              | Used |
|                               | 17 | Hand Cream                   | Used |
|                               | 22 | Skin Cream                   | Used |
|                               | 26 | Face Cleanser                | Used |
|                               | 50 | Skin Cream                   | Used |
|                               | 57 | Hand Cream                   | Used |
|                               | 15 | Body Wash                    | Used |
|                               | 25 | Body Wash                    | Used |
|                               | 4  | Shampoo                      | Used |
|                               | 14 | Shampoo                      | Used |
|                               | 16 | Hair Conditioner             | Used |
|                               | 23 | Shampoo                      | Used |
|                               | 43 | Hair Gel                     | Used |
|                               | 44 | Shampoo                      | Used |
|                               | 51 | Shampoo                      | Used |
|                               | 55 | Shampoo                      | Used |
|                               | 56 | Conditioner                  | Used |
|                               | 13 | Toothpaste                   | Used |
|                               | 24 | Toothpaste                   | Used |
|                               | 5  | Hand Soap                    | Used |
|                               | 41 | Hand Soap                    | Used |
| <b>Cleaning Products</b>      | 42 | Bathroom Cleaner             | Used |
|                               | 45 | Dish Soap                    | Used |
| <b>Other</b>                  | 90 | Metallic-Coloured Twist Ties | Used |
|                               | 79 | Black Scissors Handle        | Used |

66 **Table S2.** Instrumental detection limits (IDL,  $\mu\text{g/L}$ ) and method detection limits (MDL,  $\text{ng/g}$ )  
67 for CPs.

| <b>CP</b>    | <b>IDL by Direct API<sup>2</sup></b><br><b>(<math>\mu\text{g/L}</math>)</b> | <b>IDL by LC-DCM<sup>2</sup></b><br><b>(<math>\mu\text{g/L}</math>)</b> | <b>IDL</b><br><b>(<math>\mu\text{g/L}</math>)</b> | <b>MDL (<math>\text{ng/g}</math>)</b> |
|--------------|-----------------------------------------------------------------------------|-------------------------------------------------------------------------|---------------------------------------------------|---------------------------------------|
| <b>SCCPs</b> | 600-900                                                                     | 70-200                                                                  | 0.52                                              | 2.97                                  |
| <b>MCCPs</b> | 200-300                                                                     | 20-100                                                                  | 0.41                                              | 10.2                                  |
| <b>LCCPs</b> | 100-200                                                                     | 10-60                                                                   | 0.48                                              | 2.31                                  |

68

69 **Table S3.** Recoveries (n=3) of CP mixtures across three representative samples.

| <b>CP</b>    | <b>Hand Cream (n=3)</b> | <b>Toy (n=3)</b> | <b>Electronic Wire (n=3)</b> |
|--------------|-------------------------|------------------|------------------------------|
| <b>SCCPs</b> | 91.1 ± 7.6              | 87.2 ± 6.4       | 74.0 ± 9.4                   |
| <b>MCCPs</b> | 86.5 ± 7.1              | 86.3 ± 8.6       | 67.0 ± 7.1                   |
| <b>LCCPs</b> | 92.5 ± 10.6             | 95.4 ± 9.0       | 52.4 ± 9.3                   |



71 **Table S4.** Manufacturer-provided and experimentally determined chlorine contents for the 6  
72 technical CP mixtures used.

| <b>Technical Mixture Groups</b>            | <b>Manufacturer</b> | <b>Experimentally Determined Chlorine</b> |
|--------------------------------------------|---------------------|-------------------------------------------|
| SCCPs (C <sub>10</sub> – C <sub>13</sub> ) | 51.5%               | 55.8%                                     |
| SCCPs (C <sub>10</sub> – C <sub>13</sub> ) | 63%                 | 63.0%                                     |
| MCCPs (C <sub>14</sub> – C <sub>17</sub> ) | 42%                 | 49.8%                                     |
| MCCPs (C <sub>14</sub> – C <sub>17</sub> ) | 57%                 | 57.5%                                     |
| LCCPs (C <sub>18</sub> – C <sub>20</sub> ) | 36%                 | 43.6%                                     |
| LCCPs (C <sub>18</sub> – C <sub>20</sub> ) | 49%                 | 49.9%                                     |

73

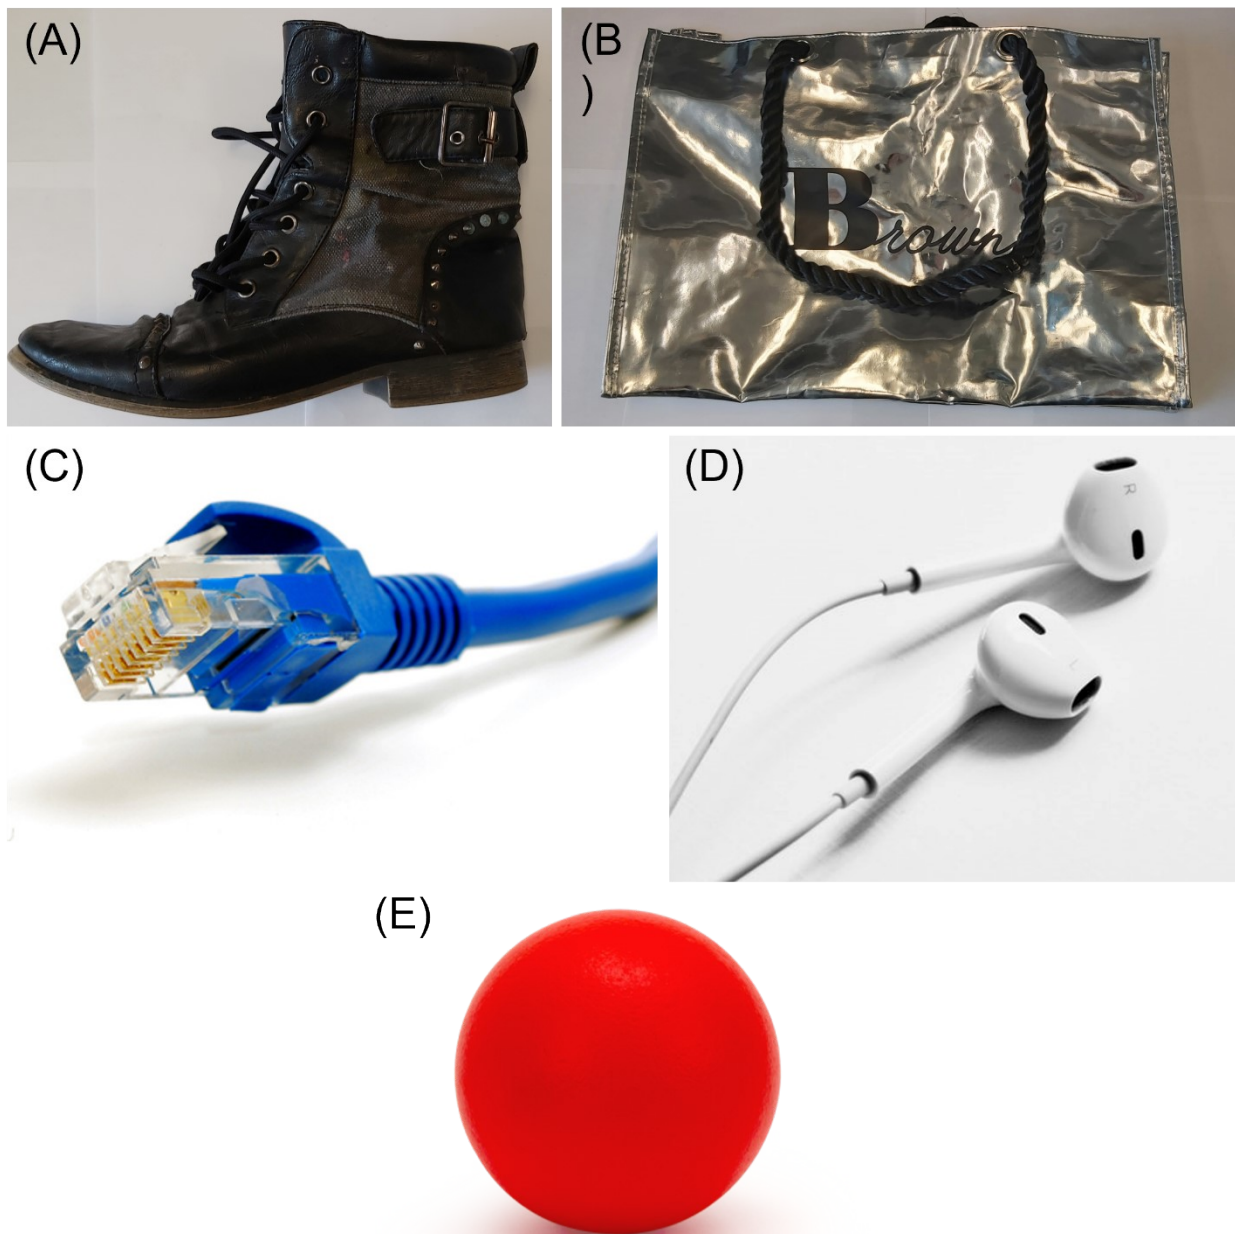

74  
75 **Figure S1.** Photos of indoor products with high concentrations of CPs. Photos A and B are of  
76 real sampled products, while photos C through E are representative of the original products. (A)  
77 A synthetic leather women's boot (Product #60, 0.55 mg SCCPs/g, 0.21 mg MCCPs/g and 0.08  
78 mg LCCPs/g). (B) A canvas reusable shopping bag (Product #61, 4.8 mg SCCPs/g, 2.6 mg  
79 MCCPs/g and 1.2 mg LCCPs/g). (C) Ethernet cable covering (Product #21, 9.34 mg SCCPs/g,  
80 18.7 mg MCCPs/g and 5.79 mg LCCPs/g). (D) Plastic wire sheath from headphones (Product #7,  
81 3.01 mg SCCPs/g, 5.05 mg MCCPs/g and 0.63 mg LCCPs/g). (E) Red foam ball toy (Product  
82 #91, 2.02 mg SCCPs/g, 3.41 mg MCCPs/g and 0.14 mg LCCPs/g)

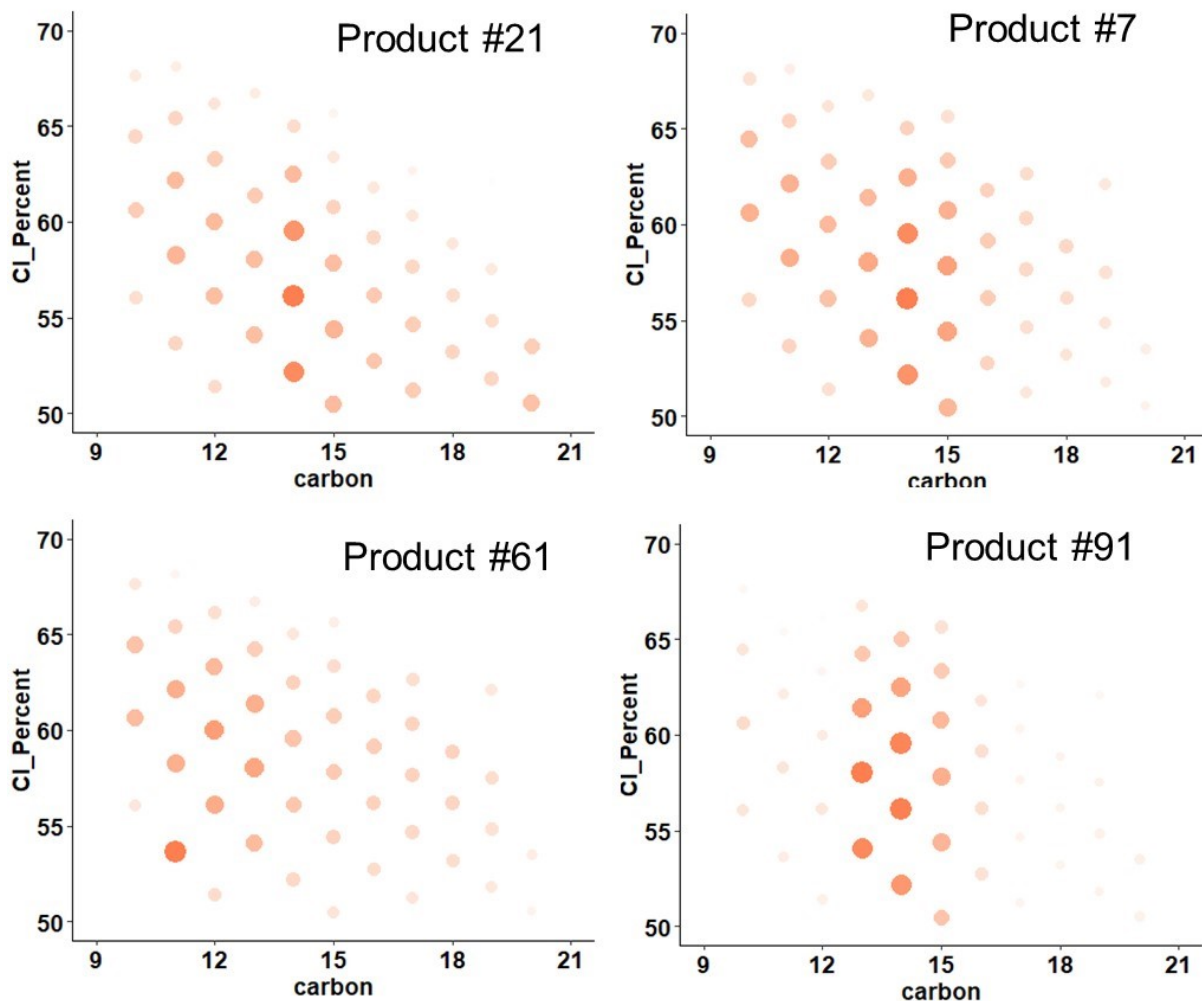

84

85 **Figure S2.** Different profiles of Homologues of chlorinated paraffins in four representative  
 86 products. Cl\_Percent indicates the percentage of chlorine in corresponding chlorinated paraffin  
 87 Homologues. Size and color of the dot is proportional to abundances.

88

## 89 References

- 90 1. Reth, M.; Zencak, Z.; Oehme, M. New quantification procedure for the analysis of  
91 chlorinated paraffins using electron capture negative ionization mass spectrometry. *J.*  
92 *Chromatogr. A* **2005**, *1081*, 225–231.
- 93 2. Li, T.; Wan, Y.; Gao, S. X.; Wang, B. L.; Hu, J. Y. High-throughput determination and  
94 characterization of short-, medium-, and long-chain chlorinated paraffins in human blood.  
95 *Environ. Sci. Technol.* 2017, *51*, 3346-3354.
